# Supplementary material
Source: PubMed Central journal article supplement (PMC8646885)

# Supp Figure 1. Treatment with melatoninerigic compounds does not improve histo-pathological profile of SARS-CoV-2 infection in K18-hACE2 mice.

A

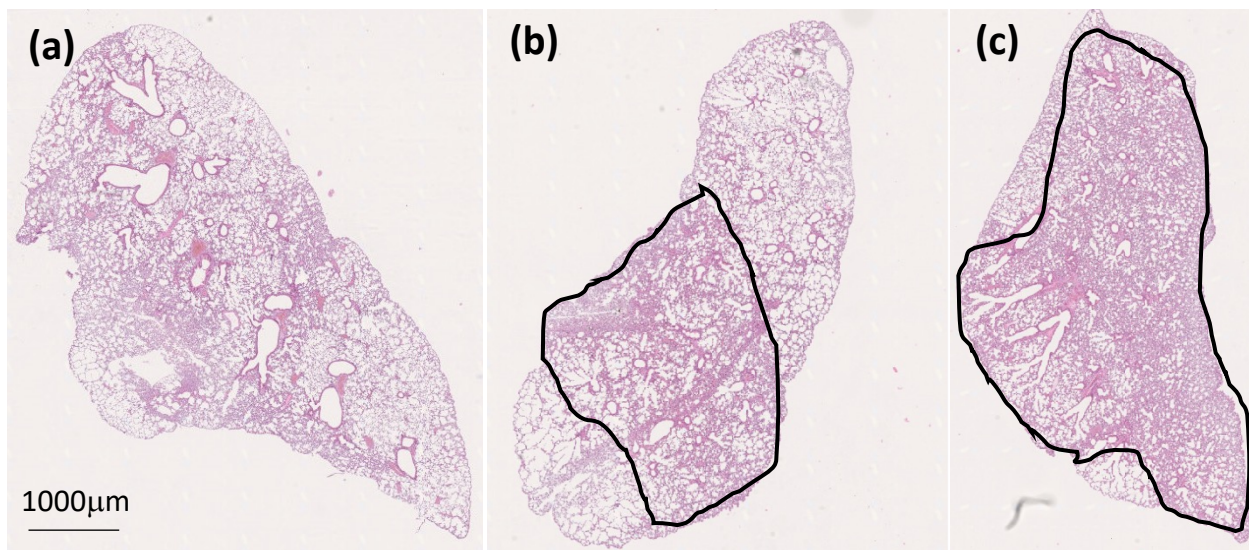

(d)

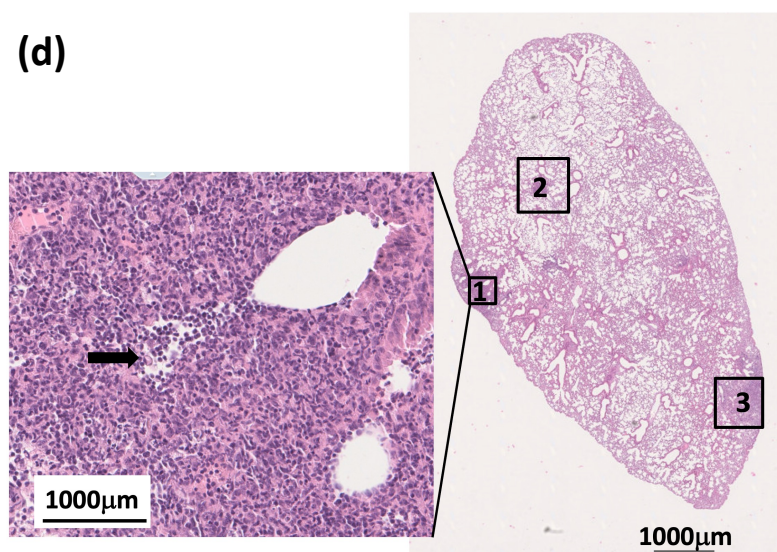

B

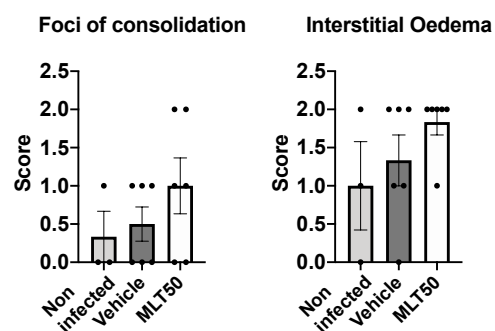

# Supp Figure 2. No correlation between lung viral RNA and most lung cytokines except IFN levels

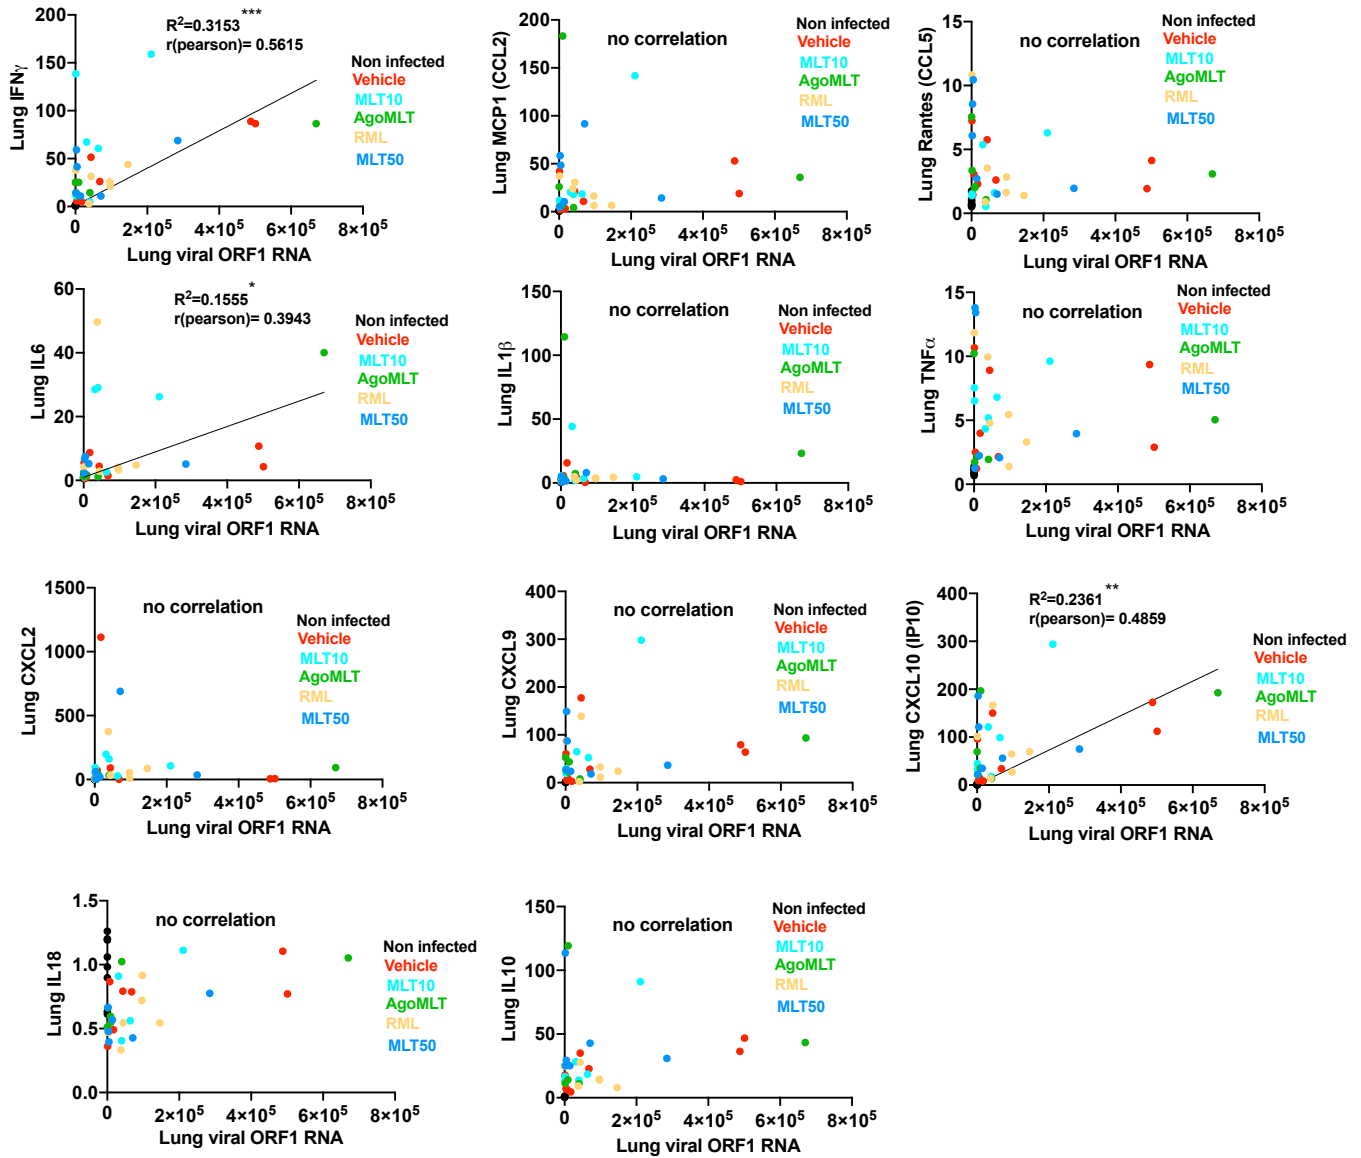

# Supp Figure 3. Correlation of lung IFN $\alpha$ , IFN $\beta$ , IFN $\lambda$ 3, IL6, IL1 $\beta$ and CXCL2 with clinical score at DPI-6.5

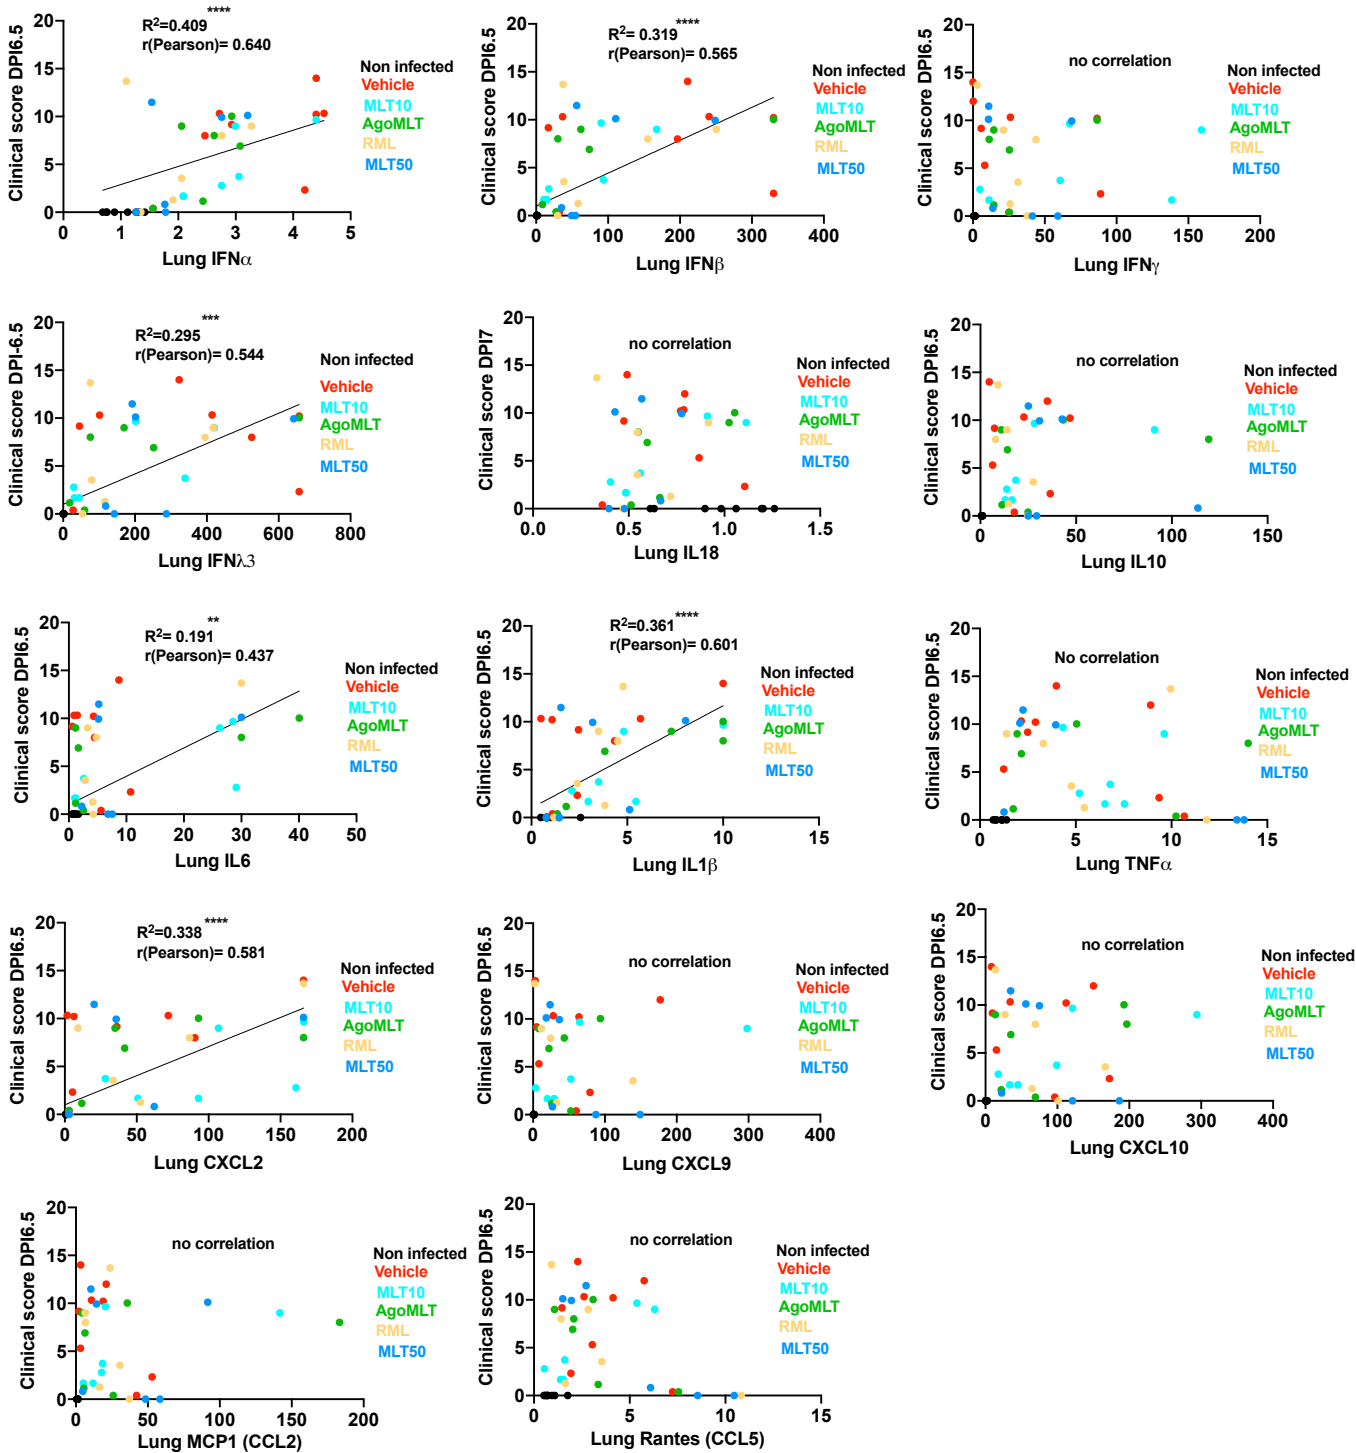

# Supp Figure 4. Correlation of lung IFN $\alpha$ , IFN $\beta$ , IL6, IL1 $\beta$ and CXCL2 with clinical score at DPI-7

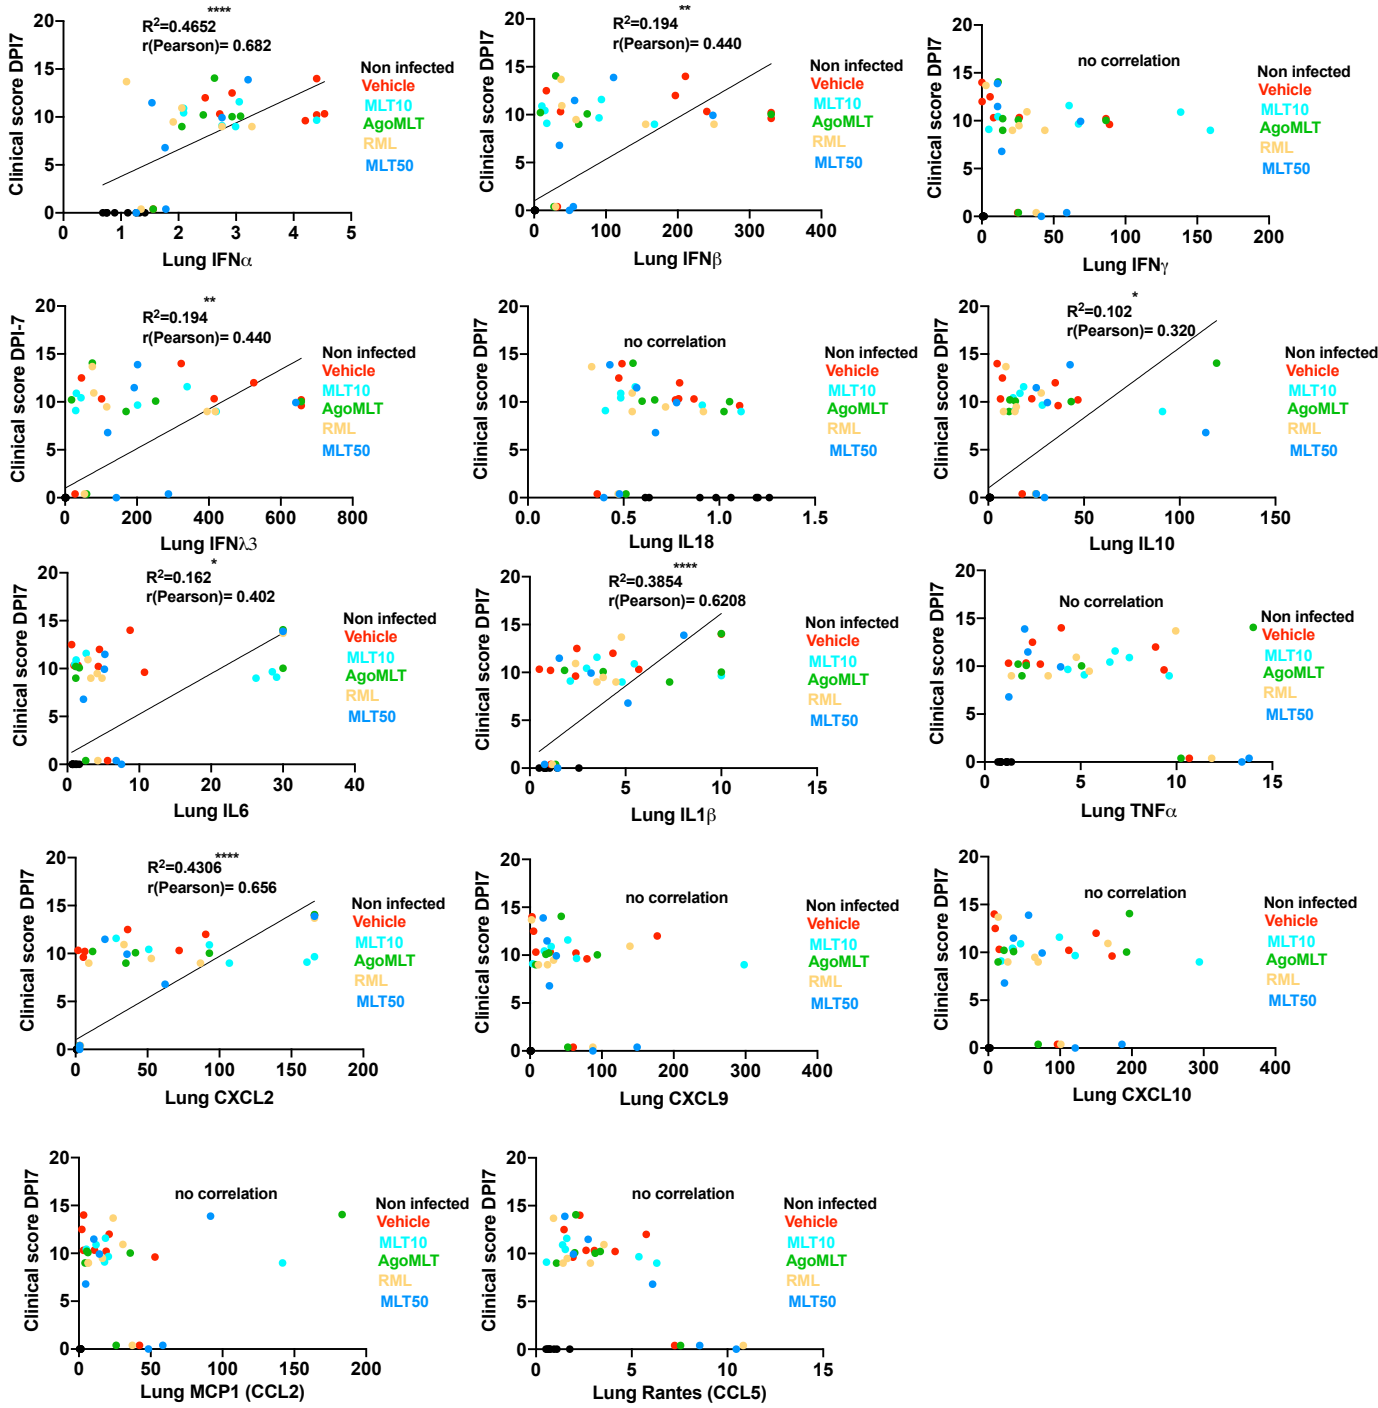

Supplement: JPI-72-0-s001.pdf [file JPI-72-0-s001.pdf]
